# Supplementary material
Source: PubMed Central journal article supplement (PMC4069254)
Supplement: NIHMS439264-supplement-1_si_001.pdf [file NIHMS439264-supplement-1_si_001.pdf]

## SUPPORTING INFORMATION

### **Synthesis of Antioxidants for Prevention of Age-related Macular Degeneration.<sup>#</sup>**

Dharati Joshi,<sup>†</sup> James Field,<sup>†</sup> John Murphy,<sup>†</sup> Mohammed Abdelrahim,<sup>†</sup> Heike Schönherr,<sup>‡</sup> Janet R. Sparrow,<sup>‡</sup> George Ellestad,<sup>†</sup> Koji Nakanishi,<sup>†</sup> and Arie Zask\*<sup>†</sup>

<sup>†</sup>Department of Chemistry, 3000 Broadway, Columbia University, New York, NY 10027, United States

<sup>‡</sup>Department of Ophthalmology, Columbia University, 630 West 168th Street, New York, NY 10032, United States

<sup>#</sup>Dedicated to Dr. Lester A. Mitscher, of the University of Kansas, for his pioneering work on the discovery of bioactive natural products and their derivatives.

\*Tel. +01-646-709-7801. Fax: +01-212-932-1289. Email: [AZ2280@columbia.edu](mailto:AZ2280@columbia.edu).

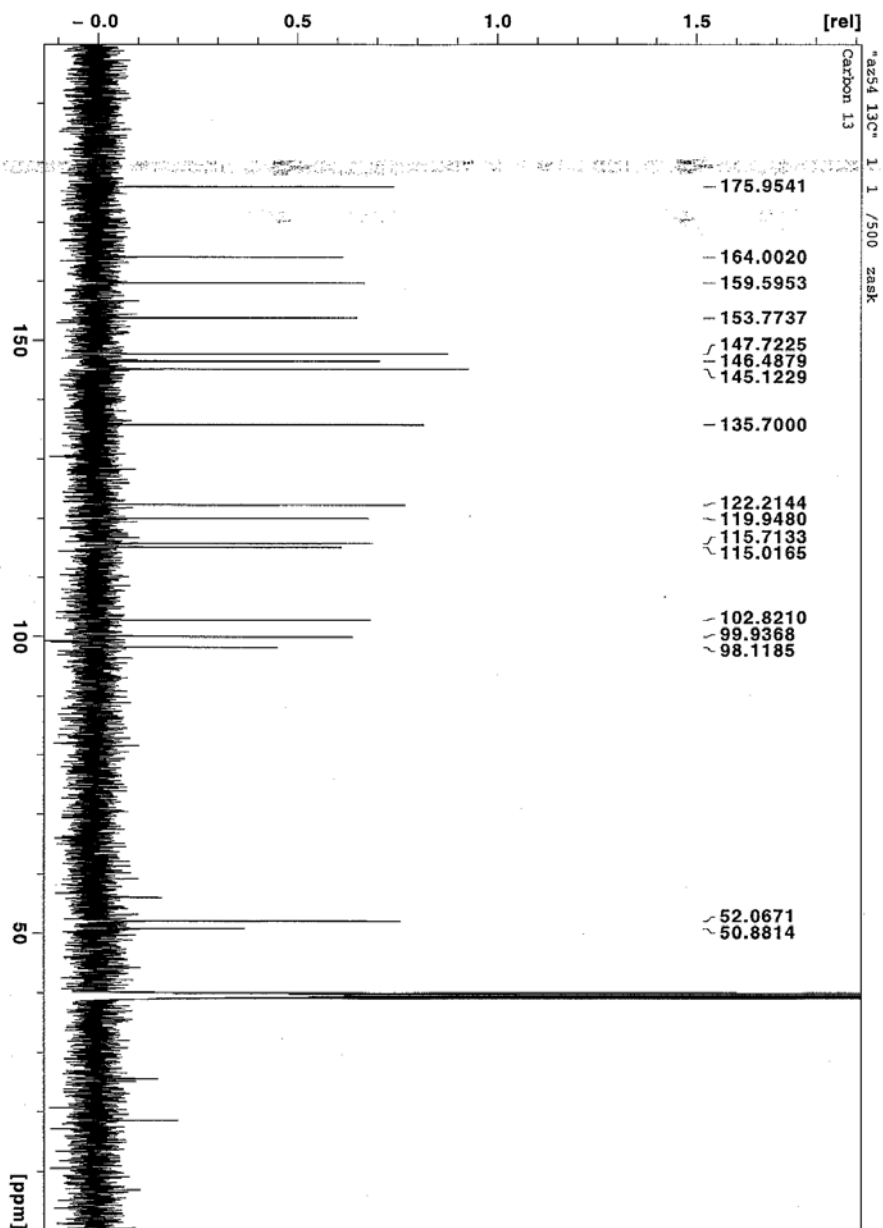

S1. <sup>13</sup>C NMR (500 MHz, DMSO-*d*<sub>6</sub>) spectrum of the new compound 3.

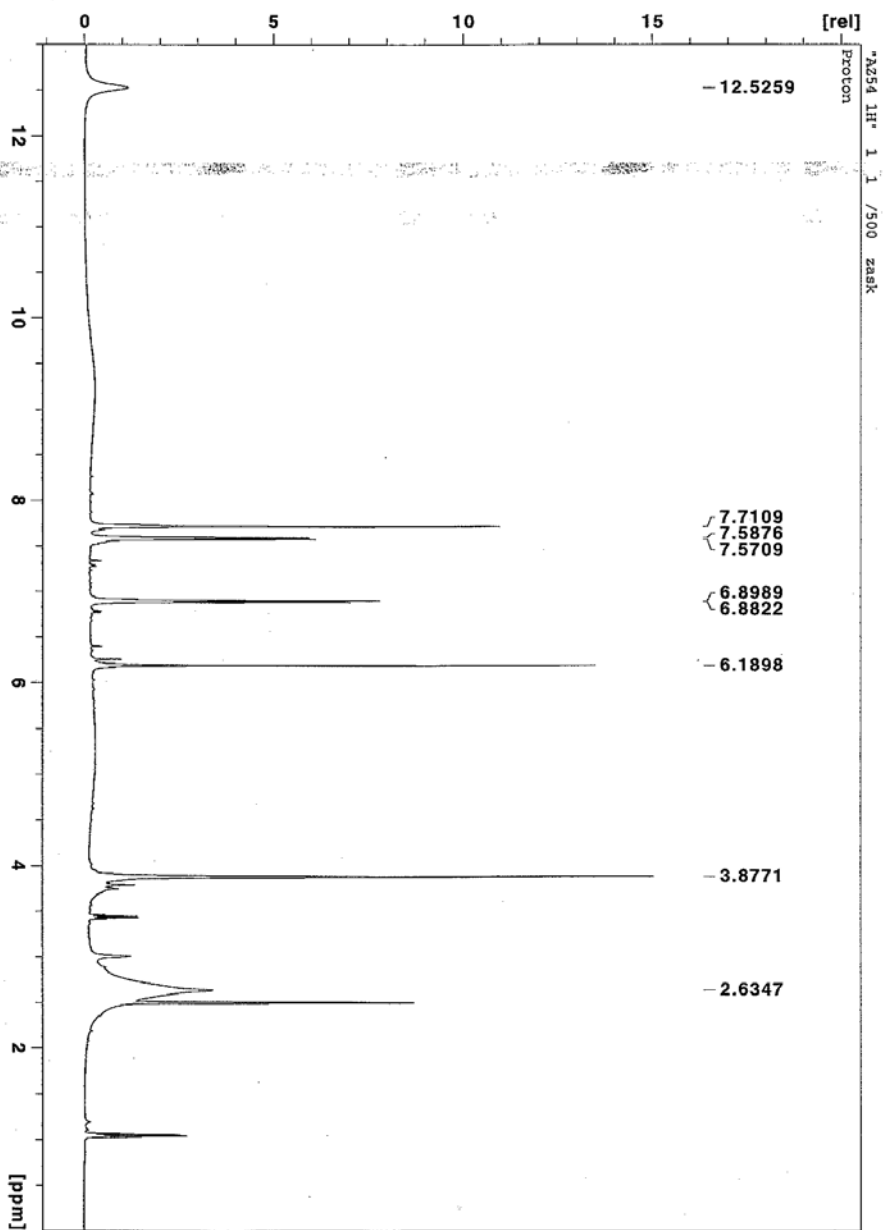

S2. <sup>1</sup>H NMR (500 MHz, DMSO-*d*<sub>6</sub>) spectrum of the new compound 3.

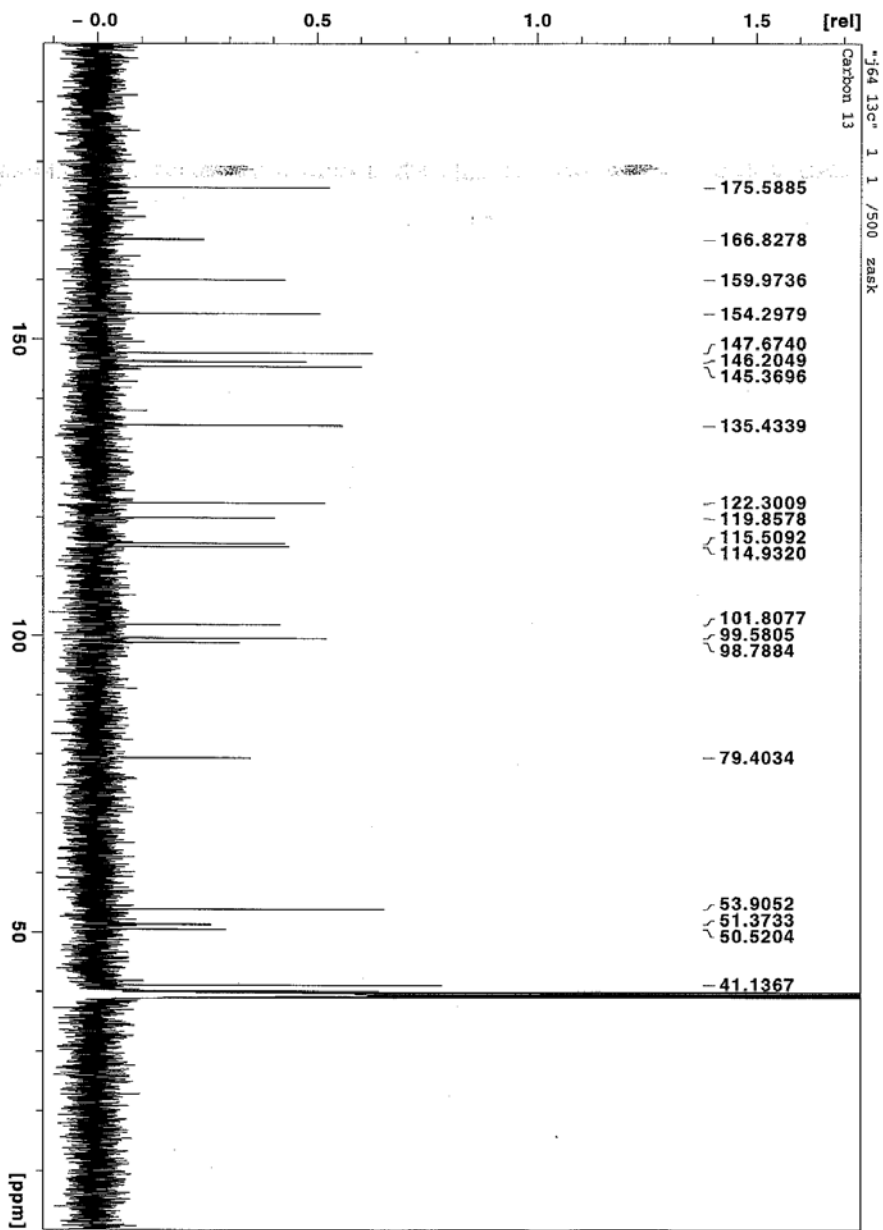

S3. <sup>13</sup>C NMR (500 MHz, DMSO-*d*<sub>6</sub>) spectrum of the new compound 4.

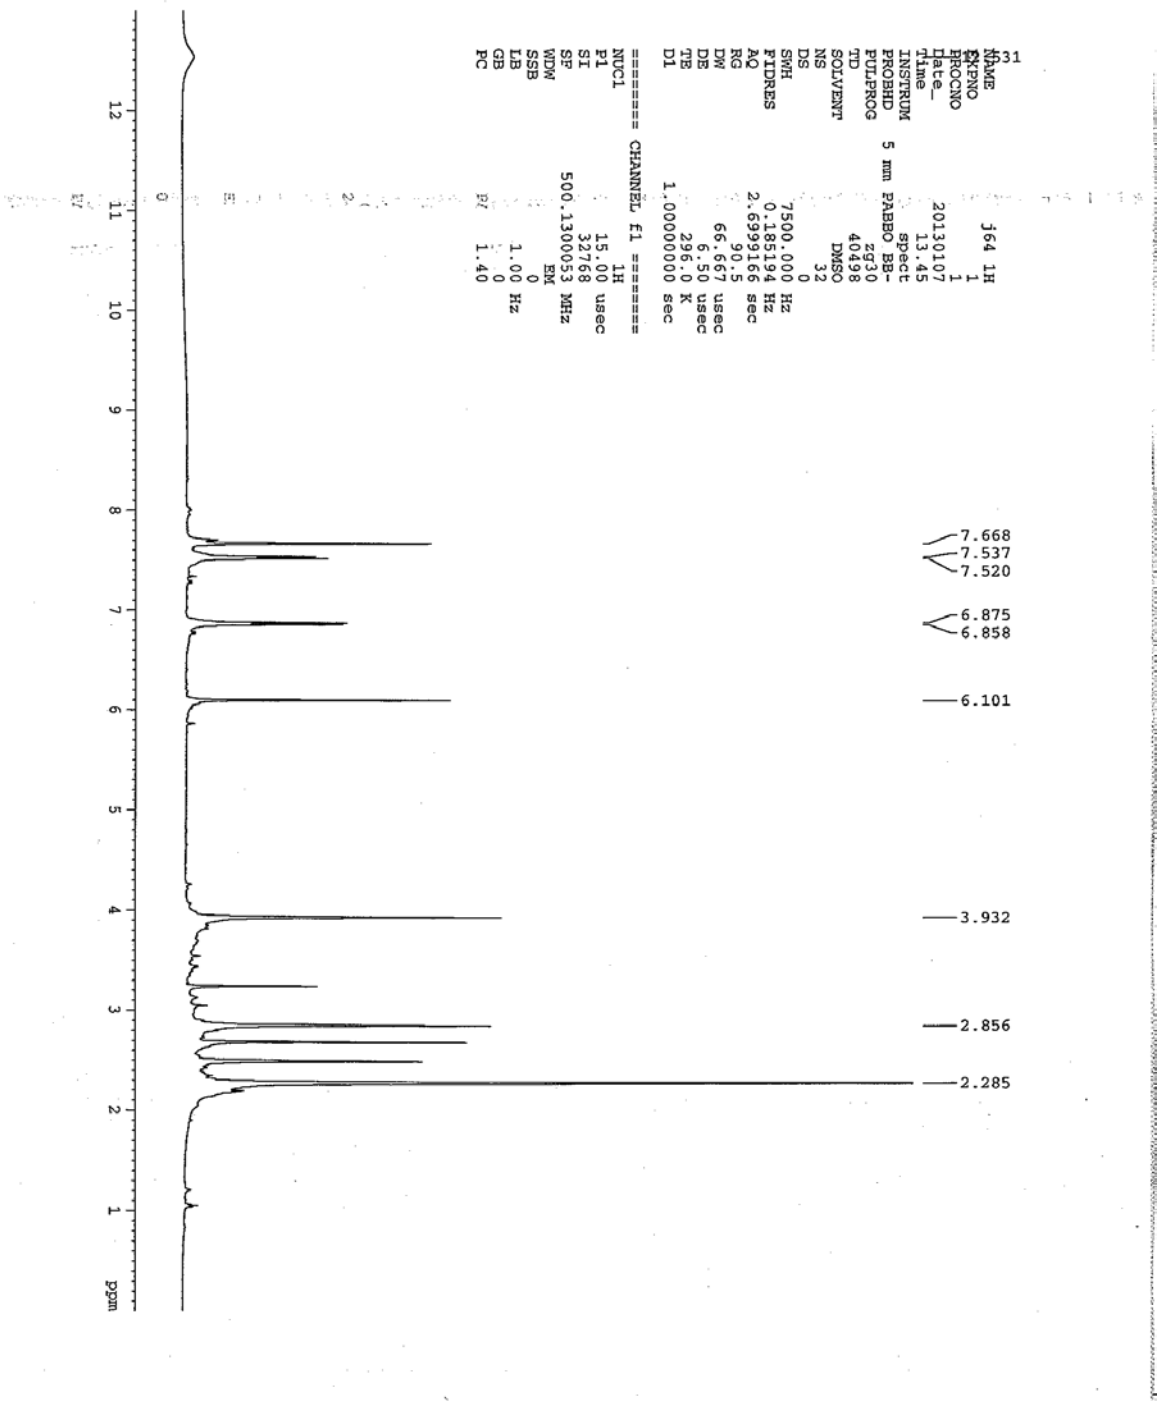

S4. <sup>1</sup>H NMR (500 MHz, DMSO-*d*<sub>6</sub>) spectrum of the new compound **4**.

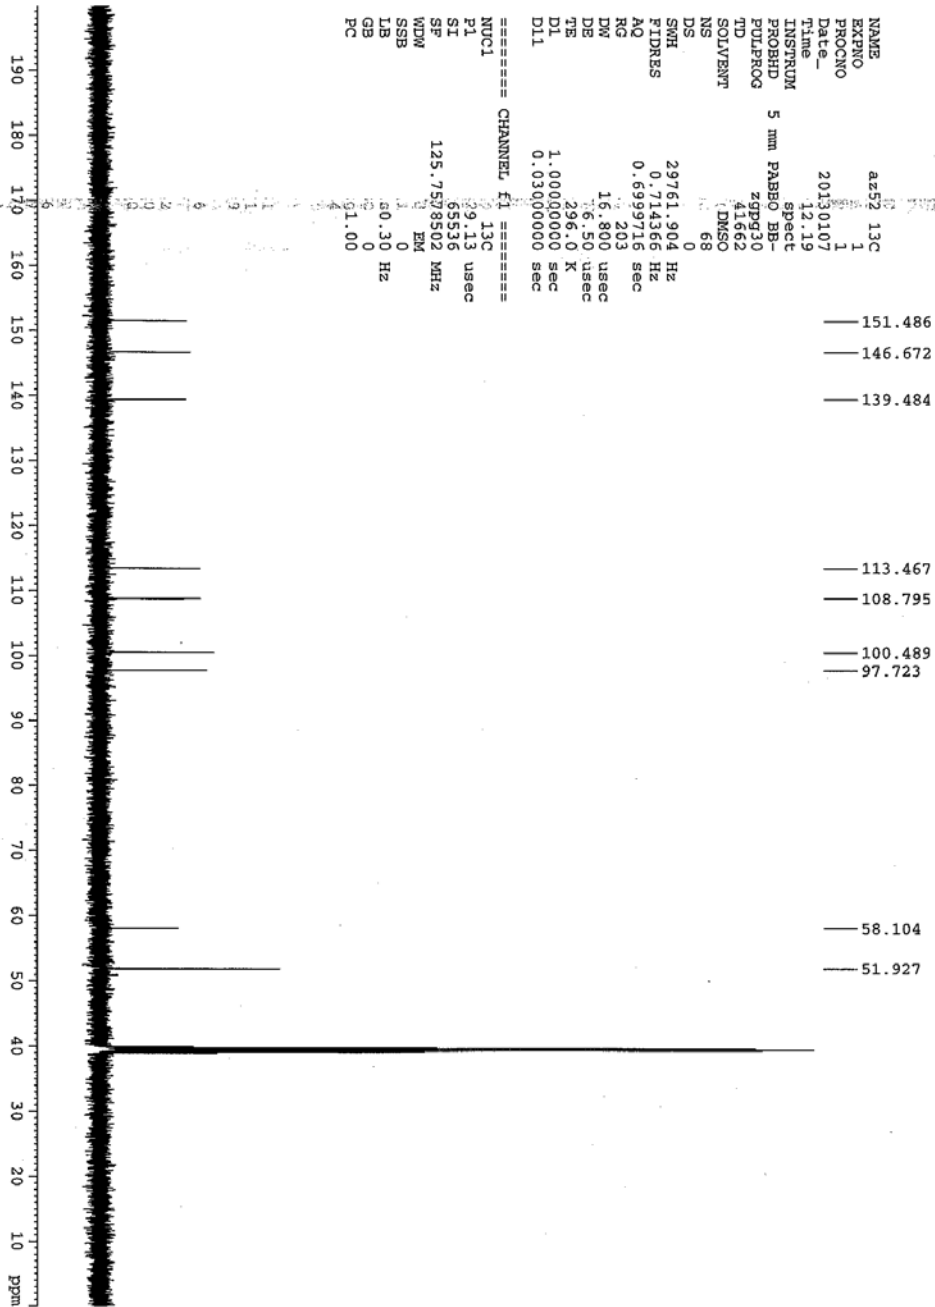

S5. <sup>13</sup>C NMR (500 MHz, DMSO-*d*<sub>6</sub>) spectrum of the new compound **5**.

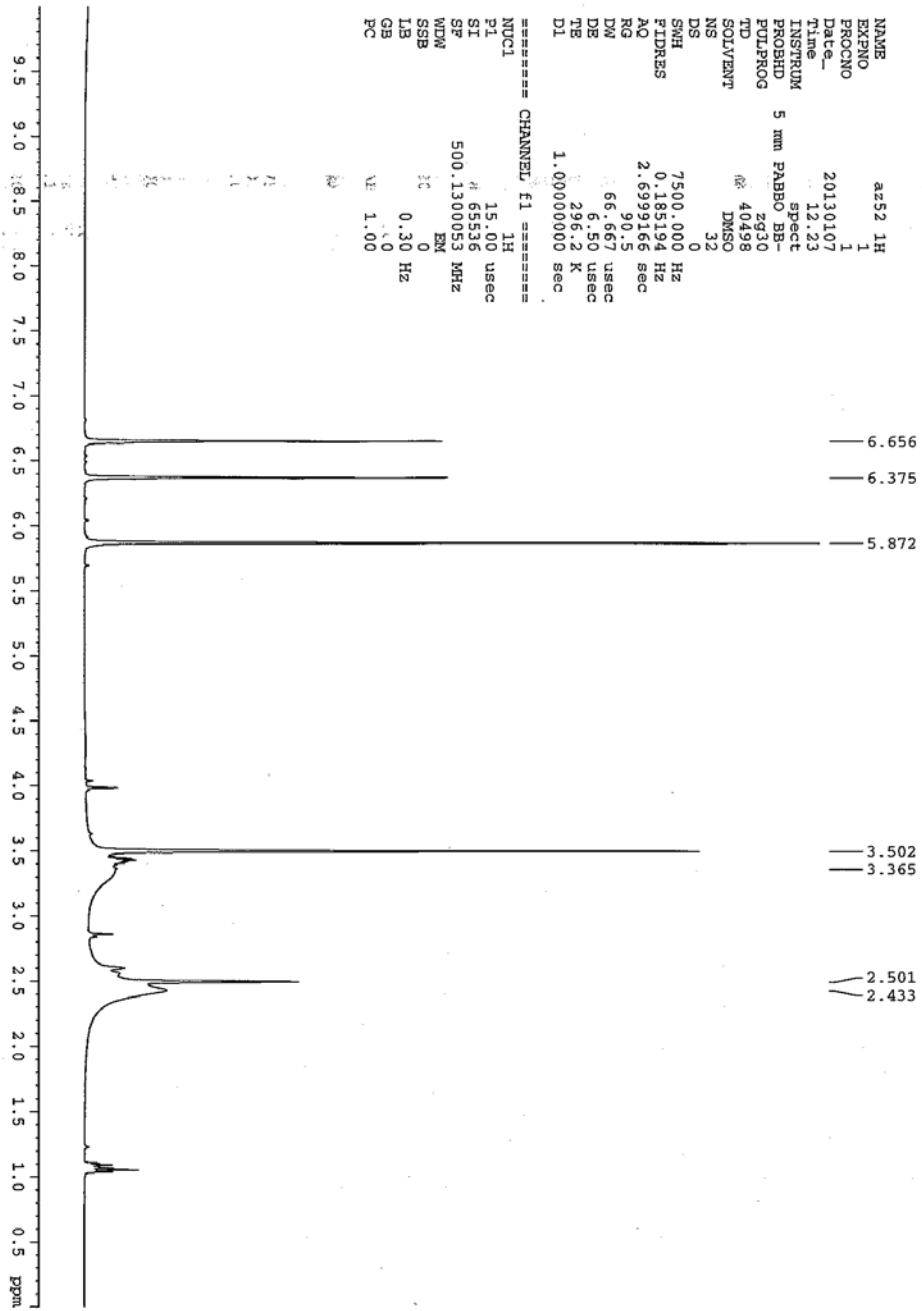

S6. <sup>1</sup>H NMR (500 MHz, DMSO-*d*<sub>6</sub>) spectrum of the new compound **5**.

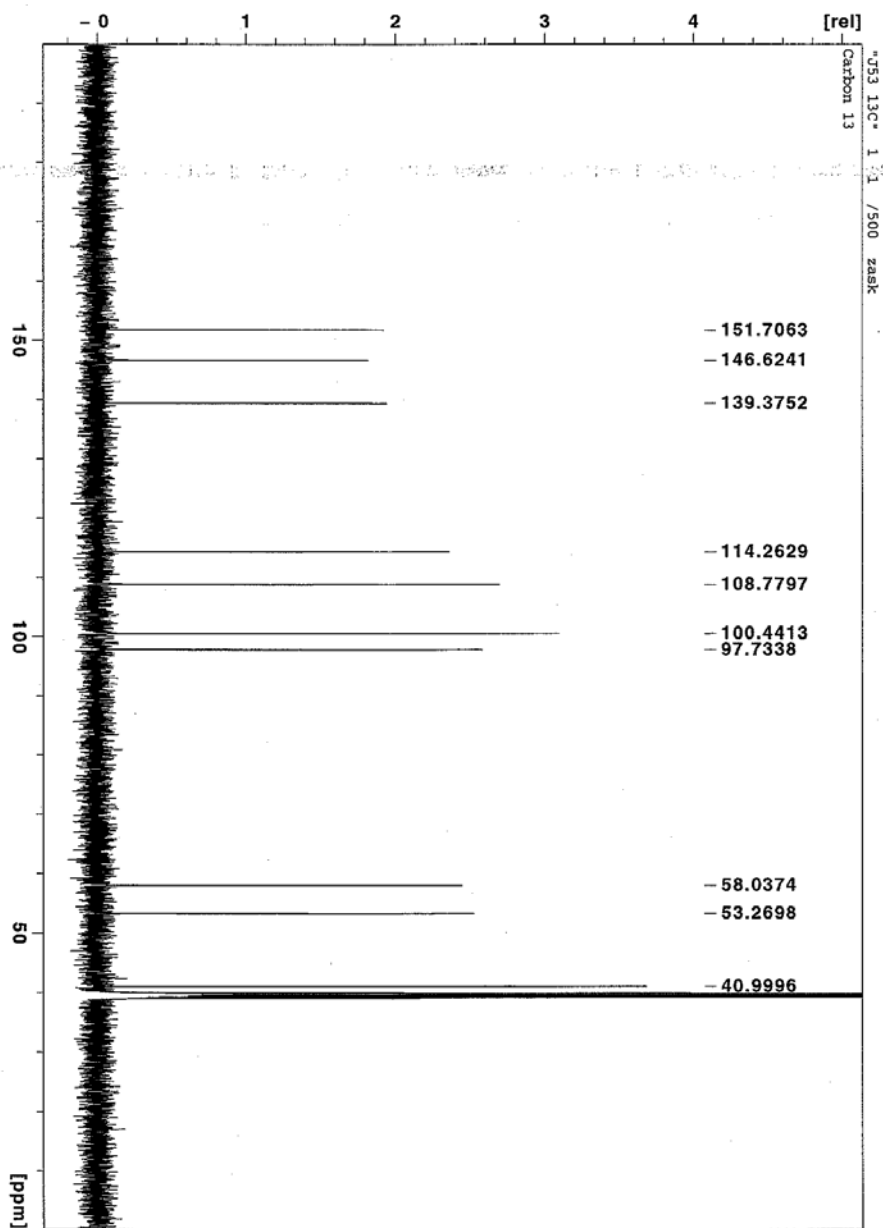

S7. <sup>13</sup>C NMR (500 MHz, DMSO-*d*<sub>6</sub>) spectrum of the new compound 6.



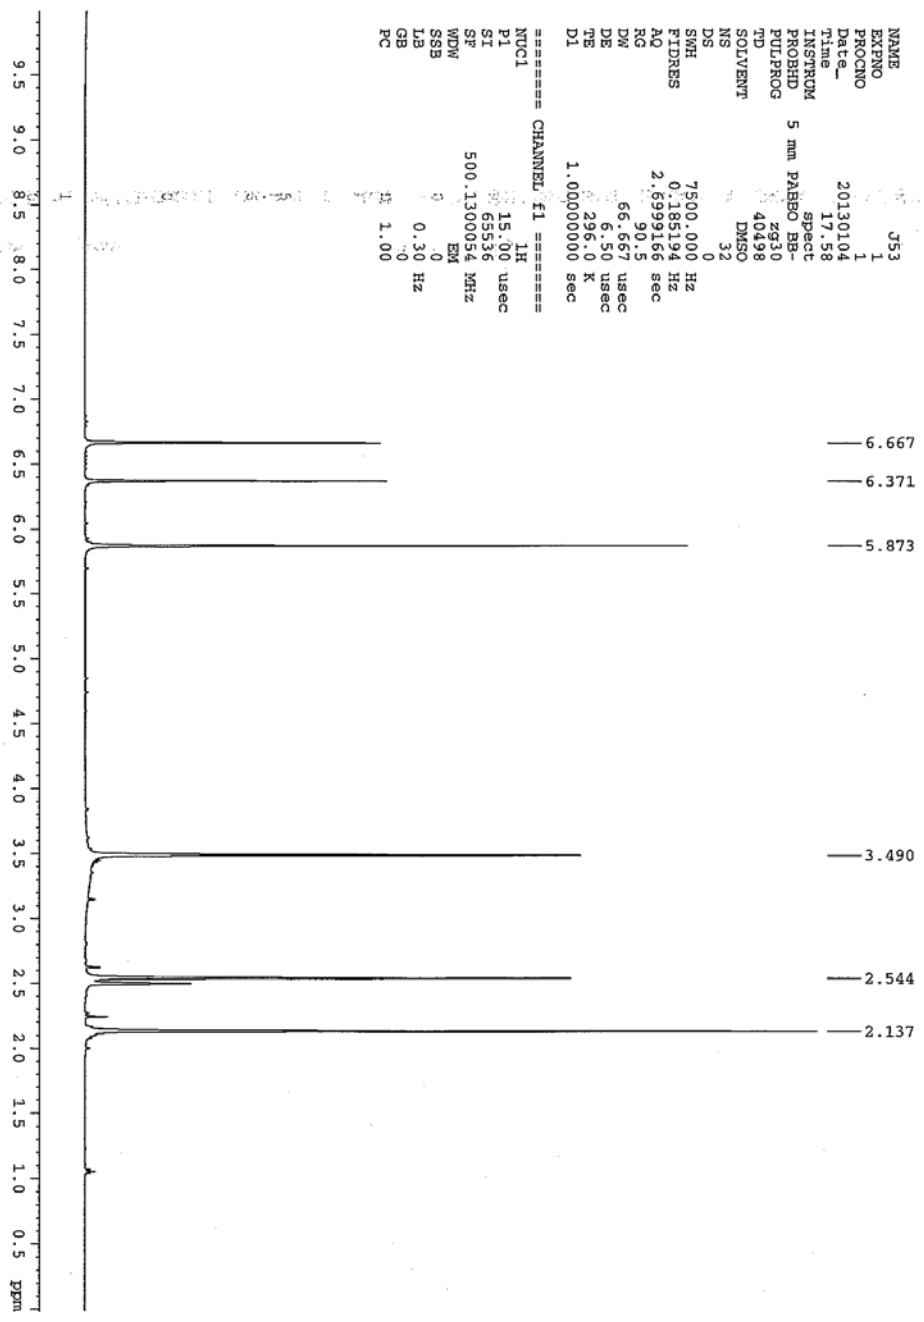

S8.  $^1\text{H}$  NMR (500 MHz,  $\text{DMSO-}d_6$ ) spectrum of the new compound **6**.

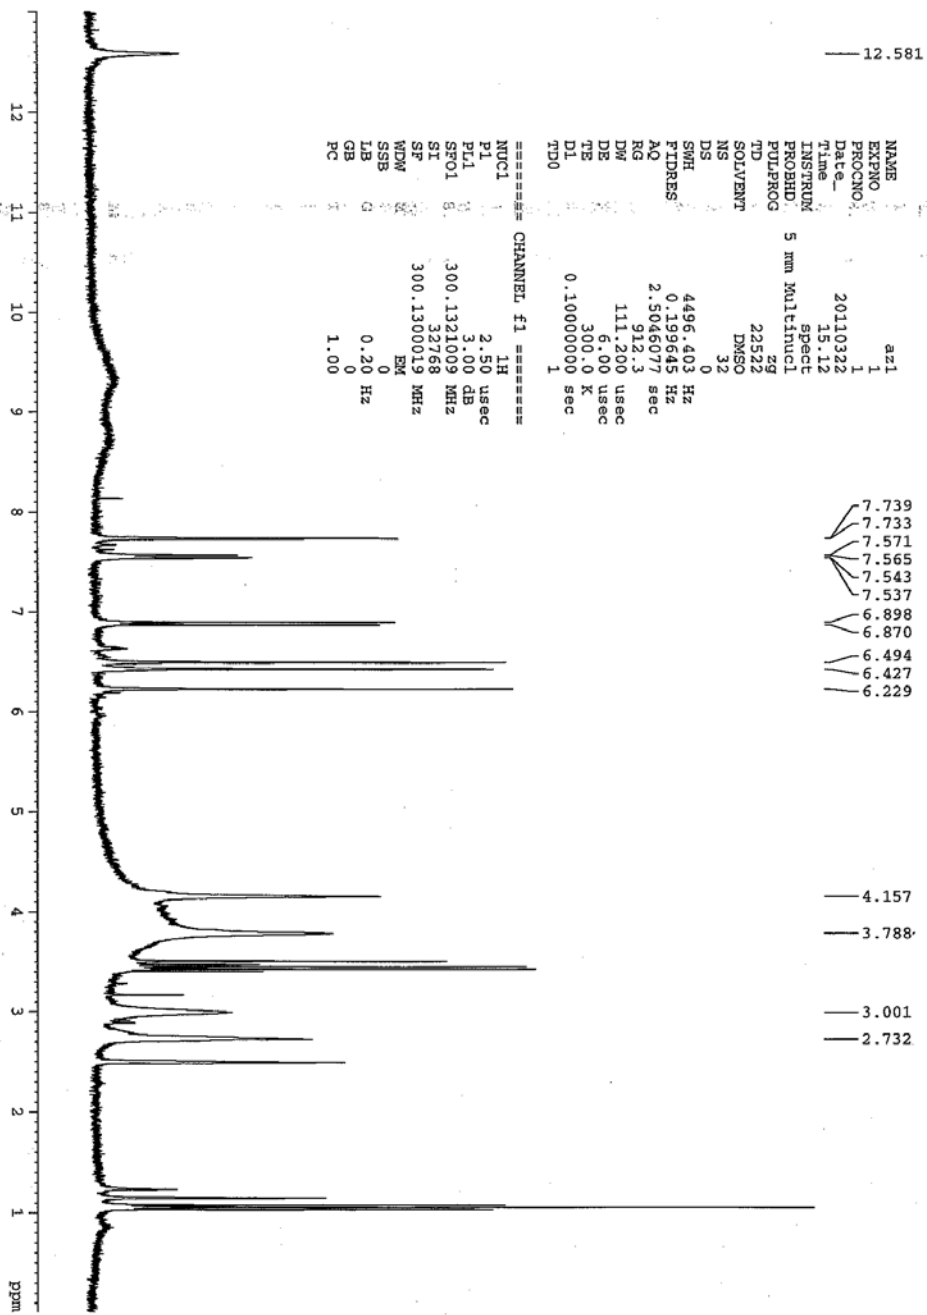

S9.  $^1\text{H}$  NMR (300 MHz,  $\text{DMSO-}d_6$ ) spectrum of the new compound **8**.

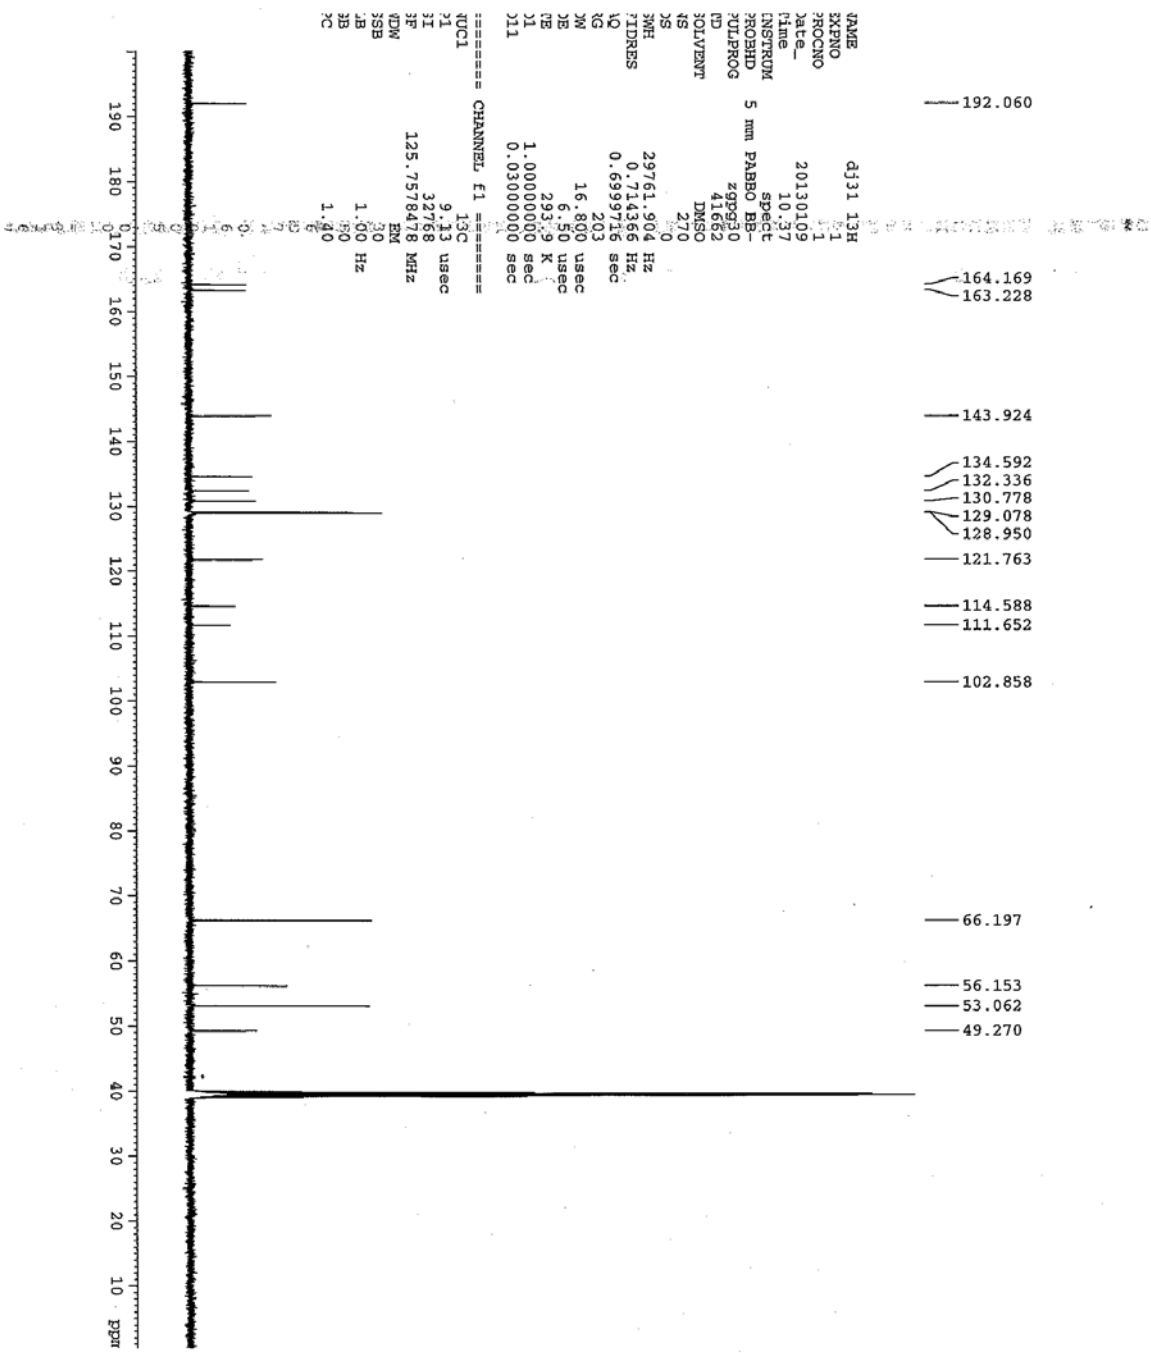

S10. <sup>13</sup>C NMR (500 MHz, DMSO-*d*<sub>6</sub>) spectrum of the new compound **10b**.

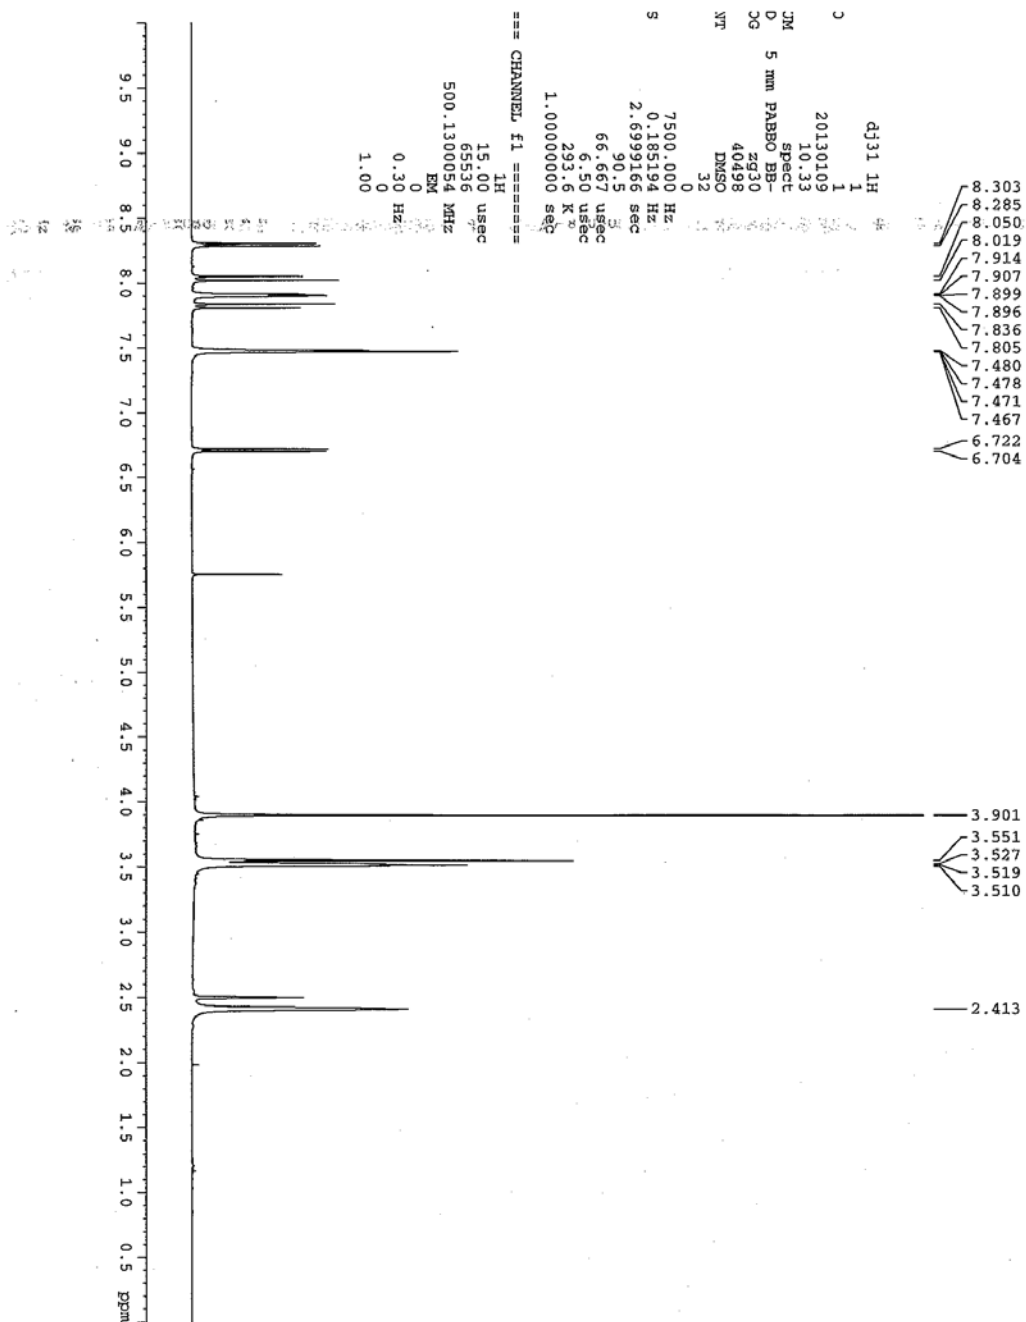

S11.  $^1\text{H}$  NMR (500 MHz,  $\text{DMSO-}d_6$ ) spectrum of the new compound **10b**.
